# Supplementary material for: Epigenetic silencing of TGFBI confers resistance to trastuzumab in human breast cancer
Source: PubMed Central journal article supplement (PMC6612099; doi:10.1186/s13058-019-1160-x), 2019-07-05

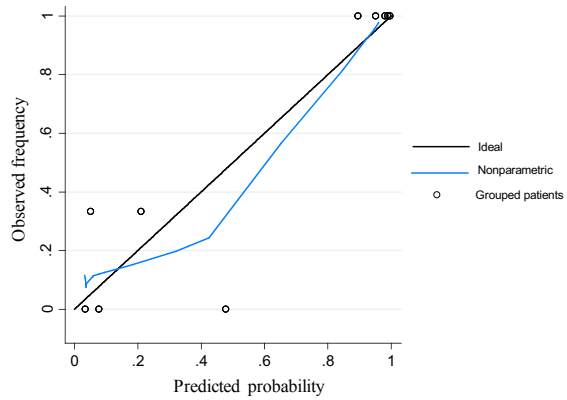

Supplement: 13058_2019_1160_MOESM4_ESM.pdf [file 13058_2019_1160_MOESM4_ESM.pdf]
