# Supplementary material for: Epigenetic silencing of TGFBI confers resistance to trastuzumab in human breast cancer
Source: Springer Nature journal article supplement (doi:10.1186/s13058-019-1160-x), 2019-07-05

**A**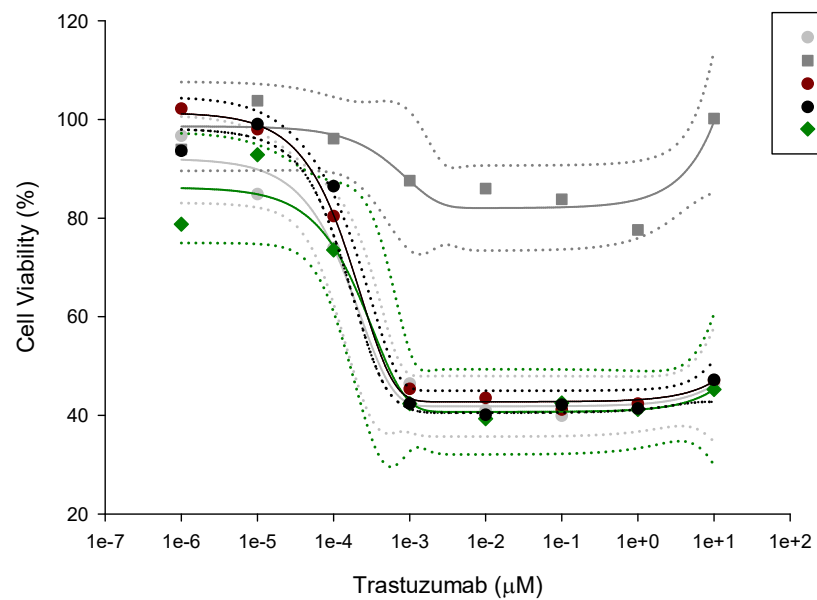**B**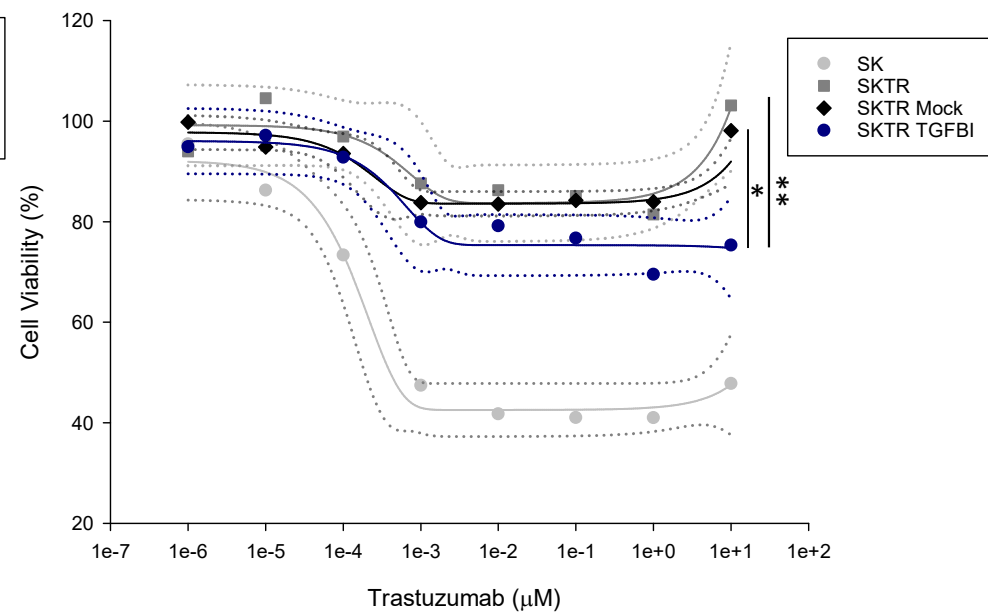**C**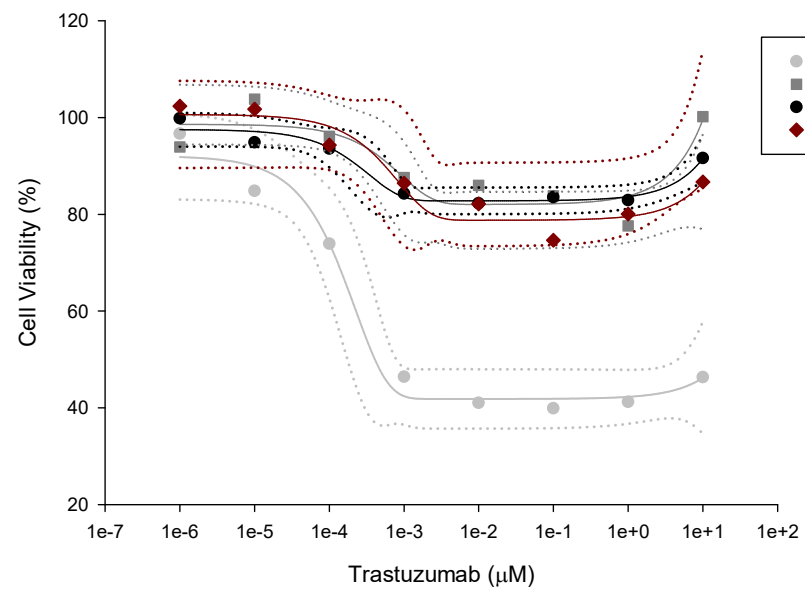

Supplement: MOESM3 [file 16901088]
